# Supplementary material for: NFAT dysregulation by increased dosage of DSCR1 and DYRK1A on chromosome 21
Source: Springer Nature journal article supplement (doi:10.1038/nature04678), 2006-03-22
Supplement: 41586_2006_BFnature04678_MOESM2_ESM.pdf [file 41586_2006_BFnature04678_MOESM2_ESM.pdf]

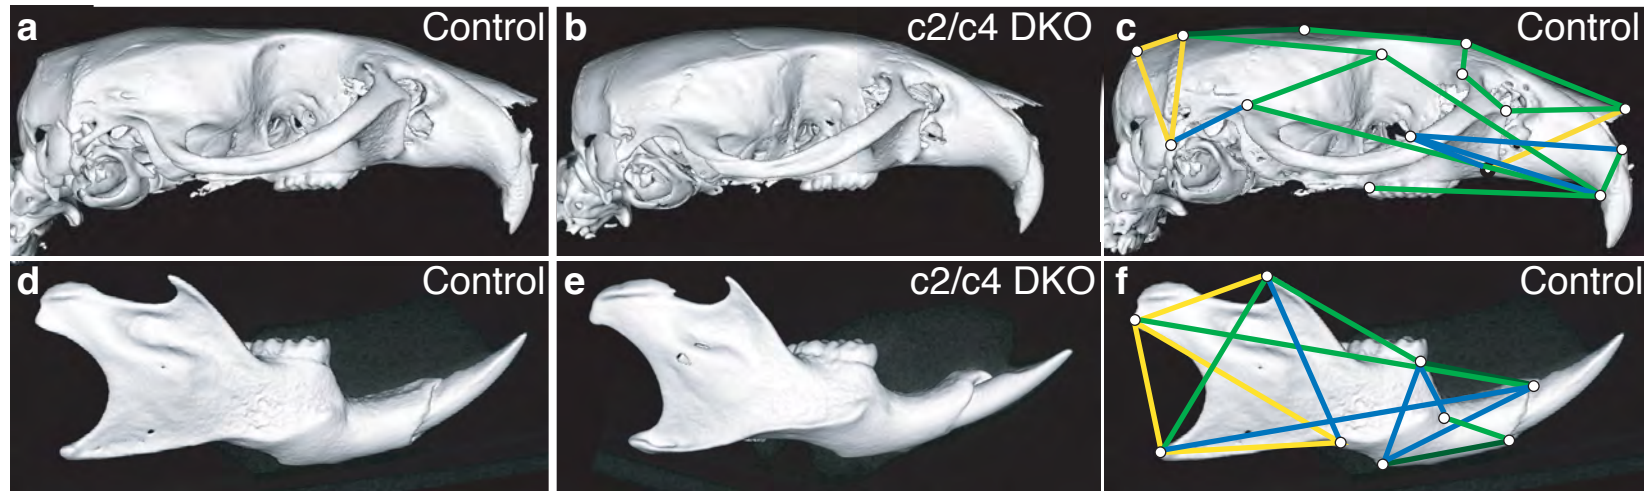

**Supplementary Figure 2.** Craniofacial phenotype of NFATc2/c4 DKO mice **a-c**, Lateral view of the crania from control (**a, c**, (n=7)) and NFATc2/c4 DKO (**b** (n=8)) mice. **d-f**, Lateral view of mandibles from control (**d,f**) and NFATc2/c4 DKO (**e**) mice. Percent differences of selected measurements from control and NFATc2/c4 DKO skulls (**c, f**,) are colour coded (yellow <5% different, light green between 5 and 10% different, dark green >10% different).
