# Supplementary material for: NFAT dysregulation by increased dosage of DSCR1 and DYRK1A on chromosome 21
Source: Springer Nature journal article supplement (doi:10.1038/nature04678), 2006-03-22
Supplement: 41586_2006_BFnature04678_MOESM3_ESM.pdf [file 41586_2006_BFnature04678_MOESM3_ESM.pdf]

Superior View of Cranium

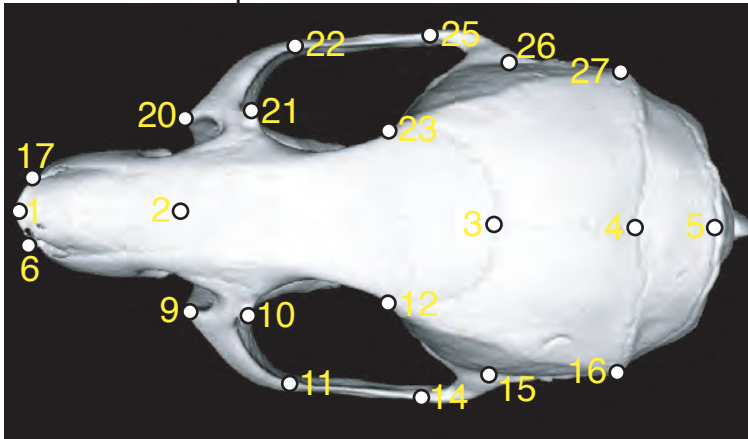

Lateral View of Cranium

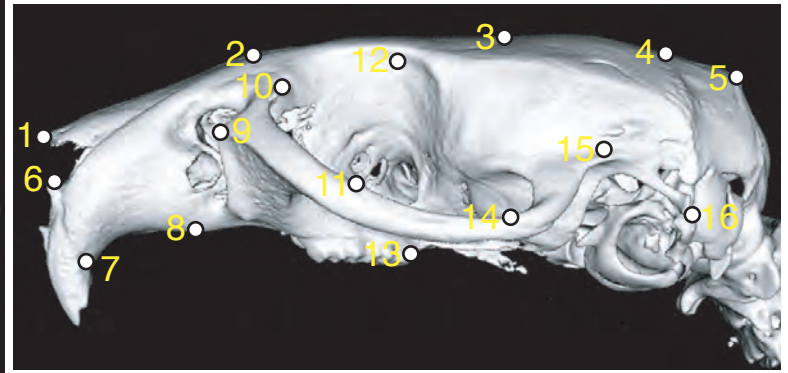

**Control Mice**

**KO Mice**

|        |    | #1    | #2    | #3    | #4    | #5    | #6    | #7    | Mean  | std  | #1    | #2    | #3    | #4    | #5    | #6    | #7    | #8    | Mean  | std  | change (%) | p-value (<) |
|--------|----|-------|-------|-------|-------|-------|-------|-------|-------|------|-------|-------|-------|-------|-------|-------|-------|-------|-------|------|------------|-------------|
| NFATc2 | wt | wt    | het   | het   | het   | het   | het   | het   |       |      | ko    | ko    | ko    | ko    | ko    | ko    | ko    | ko    |       |      |            |             |
| NFATc3 | wt | wt    | het   | het   | het   | het   | het   | het   |       |      | het   | wt    | het   | wt    | wt    | het   | het   | wt    |       |      |            |             |
| NFATc4 | wt | wt    | het   | het   | het   | het   | het   | het   |       |      | ko    | ko    | ko    | ko    | ko    | ko    | ko    | ko    |       |      |            |             |
| FROM   | TO |       |       |       |       |       |       |       |       |      |       |       |       |       |       |       |       |       |       |      |            |             |
| 1      | 2  | 7.1   | 7.43  | 7.16  | 7.43  | 7.47  | 7.04  | 7.36  | 7.28  | 0.18 | 7.21  | 6.88  | 6.72  | 6.1   | 6.41  | 6.73  | 6.89  | 6.98  | 6.74  | 0.35 | -7.47      | 0.01        |
| 1      | 7  | 4.25  | 4.1   | 4.11  | 3.8   | 4.28  | 4.47  | 4.27  | 4.18  | 0.21 | 4.21  | 4.52  | 3.79  | 4.54  | 4.1   | 4.24  | 4.3   | 3.99  | 4.21  | 0.25 | 0.68       | ns          |
| 1      | 8  | 6.97  | 6.73  | 6.43  | 6.58  | 6.6   | 6.15  | 6.66  | 6.59  | 0.25 | 6.66  | 6.2   | 5.93  | 6.15  | 6.57  | 6.34  | 6.43  | 6.19  | 6.31  | 0.24 | -4.25      | ns          |
| 1      | 9  | 5.65  | 5.86  | 5.46  | 5.62  | 5.62  | 5.22  | 5.71  | 5.59  | 0.20 | 5.34  | 5.33  | 5.3   | 4.46  | 5.11  | 5.15  | 5.32  | 5.14  | 5.14  | 0.29 | -8.01      | 0.01        |
| 1      | 10 | 7.55  | 7.53  | 7.27  | 7.24  | 7.37  | 6.89  | 7.42  | 7.32  | 0.22 | 6.93  | 6.78  | 6.59  | 5.55  | 6.6   | 6.54  | 6.62  | 6.23  | 6.48  | 0.43 | -11.53     | 0.001       |
| 1      | 12 | 10.89 | 10.65 | 10.5  | 10.61 | 10.61 | 10.48 | 10.7  | 10.63 | 0.14 | 10.46 | 9.86  | 9.28  | 8.63  | 9.29  | 9.4   | 9.52  | 9.19  | 9.45  | 0.53 | -11.10     | 0.0001      |
| 1      | 14 | 14.52 | 14.44 | 14.35 | 14.57 | 14.21 | 13.83 | 14.31 | 14.32 | 0.25 | 13.36 | 11.89 | 12.19 | 11.63 | 12.48 | 12.58 | 11.98 | 12.29 | 12.30 | 0.53 | -14.10     | 0.0001      |
| 1      | 15 | 16.57 | 16.53 | 16.05 | 15.78 | 15.57 | 15.74 | 16.19 | 16.06 | 0.39 | 14.84 | 15.07 | 14.47 | 13.85 | 14.5  | 14.48 | 14.52 | 15.01 | 14.59 | 0.39 | -9.15      | 0.0001      |
| 1      | 25 | 14.57 | 14.47 | 14.45 | 14.42 | 14.32 | 14.2  | 14.38 | 14.40 | 0.12 | 13.48 | 12.06 | 12.35 | 11.85 | 12.67 | 12.37 | 12.12 | 12.54 | 12.43 | 0.50 | -13.69     | 0.0001      |
| 1      | 4  | 19.06 | 18.71 | 18.62 | 18.65 | 18.82 | 18.16 | 18.76 | 18.68 | 0.27 | 17.41 | 17.91 | 16.23 | 15.54 | 16.73 | 16.54 | 16.79 | 17.02 | 16.77 | 0.72 | -10.23     | 0.0001      |
| 2      | 3  | 7.71  | 6.87  | 7.07  | 6.88  | 6.9   | 7.08  | 7.23  | 7.11  | 0.30 | 6.72  | 6.95  | 6.19  | 5.74  | 6.86  | 6.62  | 6.33  | 6.87  | 6.54  | 0.42 | -8.03      | 0.01        |
| 2      | 10 | 3.31  | 3.25  | 3.21  | 3.28  | 3.23  | 3.42  | 3.59  | 3.33  | 0.13 | 3.08  | 2.96  | 3.12  | 3.29  | 2.62  | 3.02  | 2.98  | 3.08  | 3.02  | 0.19 | -9.27      | 0.01        |
| 2      | 12 | 4.5   | 3.95  | 3.88  | 3.95  | 3.93  | 4.37  | 4.13  | 4.10  | 0.24 | 4.35  | 3.77  | 3.6   | 3.64  | 3.46  | 3.82  | 3.56  | 3.67  | 3.73  | 0.27 | -8.96      | 0.05        |
| 2      | 21 | 3.23  | 3.32  | 3.37  | 3.11  | 3.26  | 3.5   | 3.5   | 3.33  | 0.14 | 3.18  | 3.2   | 3.09  | 3.2   | 3.13  | 3.17  | 3.22  | 3.19  | 3.17  | 0.04 | -4.65      | 0.05        |
| 2      | 23 | 4.55  | 4.17  | 3.89  | 3.74  | 3.81  | 4.56  | 4.07  | 4.11  | 0.34 | 3.68  | 3.88  | 3.85  | 3.2   | 3.74  | 3.76  | 3.89  | 3.92  | 3.74  | 0.23 | -9.07      | 0.05        |
| 4      | 3  | 4.36  | 4.42  | 4.61  | 4.43  | 4.54  | 4.48  | 4.47  | 4.47  | 0.08 | 3.83  | 3.94  | 3.84  | 3.77  | 3.61  | 3.73  | 3.84  | 3.91  | 3.81  | 0.10 | -14.85     | 0.0001      |
| 4      | 5  | 3.26  | 3.24  | 3.08  | 3.06  | 2.97  | 3.33  | 3.01  | 3.14  | 0.14 | 2.94  | 3.32  | 3.12  | 3.17  | 3.22  | 3.12  | 3.23  | 3.24  | 3.17  | 0.11 | 1.09       | ns          |
| 4      | 6  | 19.43 | 19.17 | 18.97 | 19.22 | 19.17 | 19.2  | 19.1  | 19.18 | 0.14 | 17.86 | 18.35 | 16.59 | 17    | 17.42 | 17.59 | 17.92 | 18.01 | 17.59 | 0.57 | -8.28      | 0.0001      |
| 4      | 7  | 20.07 | 19.98 | 20.08 | 20.06 | 20    | 20.17 | 19.97 | 20.05 | 0.07 | 18.64 | 19.04 | 17.56 | 18.42 | 18.22 | 18.12 | 18.27 | 18.54 | 18.35 | 0.43 | -8.46      | 0.0001      |
| 4      | 12 | 8.74  | 8.65  | 8.51  | 8.61  | 8.57  | 8.47  | 8.52  | 8.58  | 0.09 | 7.64  | 8.36  | 7.55  | 7.71  | 7.84  | 7.65  | 7.86  | 7.56  | 7.77  | 0.26 | -9.44      | 0.0001      |
| 4      | 14 | 9.92  | 9.97  | 9.51  | 9.42  | 9.6   | 9.68  | 9.36  | 9.64  | 0.24 | 9     | 9.56  | 8.66  | 9.27  | 8.91  | 9.24  | 9.22  | 9.42  | 9.16  | 0.29 | -4.95      | 0.01        |
| 4      | 15 | 6.73  | 6.66  | 6.68  | 6.79  | 6.8   | 6.68  | 6.59  | 6.70  | 0.07 | 6.59  | 7.01  | 6.24  | 6.46  | 6.4   | 6.6   | 6.56  | 6.62  | 6.56  | 0.22 | -2.15      | ns          |
| 4      | 16 | 6.49  | 6.34  | 6.15  | 6.28  | 6.32  | 6.27  | 6.12  | 6.28  | 0.12 | 5.63  | 6.4   | 5.67  | 6.18  | 6.16  | 6.21  | 5.87  | 6.1   | 6.03  | 0.27 | -4.04      | 0.05        |
| 4      | 17 | 19.18 | 19.17 | 19.21 | 19.23 | 19.17 | 19.33 | 19.19 | 19.21 | 0.06 | 17.96 | 18.29 | 16.54 | 17.2  | 17.4  | 17.42 | 17.68 | 17.72 | 17.53 | 0.53 | -7.77      | 0.0001      |
| 4      | 23 | 9.01  | 8.75  | 8.6   | 8.65  | 8.57  | 8.49  | 8.61  | 8.67  | 0.17 | 7.71  | 8.24  | 7.65  | 7.8   | 7.79  | 7.72  | 7.84  | 7.82  | 7.82  | 0.18 | -9.77      | 0.0001      |
| 4      | 25 | 9.89  | 9.97  | 9.55  | 9.47  | 9.62  | 9.72  | 9.42  | 9.66  | 0.21 | 9.1   | 9.52  | 8.79  | 9.22  | 8.99  | 9.35  | 9.11  | 9.37  | 9.18  | 0.23 | -4.98      | 0.001       |
| 4      | 26 | 6.74  | 6.75  | 6.52  | 6.62  | 6.58  | 6.54  | 6.73  | 6.64  | 0.10 | 6.54  | 6.82  | 6.23  | 6.56  | 6.27  | 6.51  | 6.41  | 6.53  | 6.48  | 0.19 | -2.35      | ns          |
| 4      | 27 | 6.52  | 6.32  | 6.2   | 6.24  | 6.3   | 6.28  | 6.15  | 6.29  | 0.12 | 5.75  | 6.35  | 5.89  | 6.12  | 6.15  | 6.17  | 5.99  | 6.13  | 6.07  | 0.19 | -3.47      | 0.05        |
| 5      | 12 | 11.62 | 11.49 | 11.36 | 11.48 | 11.47 | 11.61 | 11.42 | 11.49 | 0.09 | 10.41 | 11.15 | 10.27 | 10.73 | 10.76 | 10.46 | 10.73 | 10.77 | 10.66 | 0.27 | -7.25      | 0.0001      |
| 5      | 15 | 8.33  | 7.97  | 8.66  | 8.3   | 8.4   | 8.49  | 8.26  | 8.34  | 0.21 | 7.78  | 8.56  | 7.25  | 7.8   | 7.95  | 7.81  | 7.9   | 7.92  | 7.87  | 0.36 | -5.67      | 0.01        |
| 5      | 16 | 6.72  | 6.36  | 6.33  | 6.42  | 6.49  | 6.67  | 6.39  | 6.48  | 0.15 | 6.05  | 6.74  | 5.56  | 6.19  | 6.31  | 6.25  | 6.17  | 6.45  | 6.22  | 0.34 | -4.13      | ns          |
| 5      | 26 | 8.24  | 8.04  | 8.81  | 8.32  | 8.34  | 8.14  | 8.14  | 8.29  | 0.25 | 8.05  | 7.76  | 7.54  | 8.44  | 7.67  | 7.81  | 7.72  | 7.9   | 7.86  | 0.28 | -5.17      | 0.01        |
| 5      | 27 | 6.67  | 6.85  | 6.78  | 6.68  | 6.73  | 6.43  | 6.38  | 6.65  | 0.18 | 6.64  | 6.06  | 5.85  | 6.48  | 6.49  | 6.42  | 6.35  | 6.61  | 6.30  | 0.33 | -5.14      | 0.05        |
| 6      | 7  | 2.63  | 2.82  | 2.61  | 2.6   | 2.56  | 2.51  | 2.62  | 2.62  | 0.10 | 2.42  | 2.46  | 2.31  | 2.64  | 2.49  | 2.43  | 2.48  | 2.51  | 2.47  | 0.09 | -5.87      | 0.01        |
| 6      | 9  | 5.38  | 5.69  | 5.19  | 5.36  | 5.34  | 5.39  | 5.32  | 5.38  | 0.15 | 5.43  | 5.39  | 4.9   | 4.88  | 5.13  | 5.22  | 5.4   | 5.35  | 5.21  | 0.22 | -3.14      | ns          |
| 6      | 10 | 7.7   | 7.6   | 7.35  | 7.55  | 7.39  | 7.61  | 7.42  | 7.52  | 0.13 | 7.5   | 7.39  | 6.74  | 6.76  | 7.2   | 7.12  | 7.19  | 7.33  | 7.15  | 0.28 | -4.83      | 0.01        |
| 6      | 11 | 10.29 | 10.14 | 9.91  | 10.22 | 10.24 | 9.69  | 10.01 | 10.07 | 0.22 | 9.14  | 9.64  | 8.15  | 8.36  | 8.86  | 8.9   | 8.81  | 8.79  | 8.83  | 0.45 | -12.31     | 0.0001      |
| 6      | 12 | 11.32 | 11.07 | 10.82 | 10.99 | 10.94 | 11.41 | 10.98 | 11.08 | 0.21 | 10.93 | 10.53 | 9.5   | 9.94  | 10.05 | 10.21 | 9.98  | 10.15 | 10.16 | 0.42 | -8.26      | 0.0001      |
| 7      | 8  | 6.03  | 6.3   | 6.08  | 6.12  | 6.09  | 6.29  | 6.09  | 6.14  | 0.11 | 6.29  | 5.88  | 5.34  | 6.27  | 6.31  | 6.23  | 6.1   | 6.24  | 6.08  | 0.33 | -0.98      | ns          |
| 7      | 9  | 6.61  | 6.98  | 6.66  | 6.85  | 6.72  | 6.9   | 6.54  | 6.75  | 0.16 | 6.57  | 6.51  | 6.01  | 6.34  | 6.52  | 6.42  | 6.4   | 6.61  | 6.42  | 0.19 | -4.87      | 0.01        |
| 7      | 11 | 10.61 | 10.74 | 10.53 | 10.97 | 10.9  | 10.68 | 10.45 | 10.70 | 0.19 | 9.74  | 9.94  | 9.27  | 9.48  | 9.49  | 9.56  | 9.39  | 9.71  | 9.57  | 0.21 | -10.52     | 0.0001      |
| 7      | 12 | 12.41 | 12.29 | 12.14 | 12.27 | 12.23 | 12.74 | 12.08 | 12.31 | 0.22 | 11.89 | 11.54 | 10.57 | 11.42 | 11.35 | 11.32 | 10.98 | 11.33 | 11.30 | 0.39 | -8.19      | 0.0001      |
| 7      | 13 | 11.02 | 11.04 | 11.06 | 10.88 | 10.91 | 11.18 | 10.92 | 11.00 | 0.11 | 10.32 | 10.44 | 9.83  | 10.45 | 10.25 | 10.12 | 9.99  | 10.29 | 10.21 | 0.22 | -7.18      | 0.0001      |
| 7      | 15 | 16.62 | 16.78 | 16.1  | 16.41 | 16.59 | 16.97 | 16.76 | 16.60 | 0.28 | 15.64 | 15.62 | 14.85 | 14.93 | 15.39 | 15.21 | 14.98 | 15.43 | 15.26 | 0.31 | -8.12      | 0.0001      |
| 8      | 9  | 2.94  | 3     | 2.75  | 2.78  | 2.88  | 2.96  | 3.23  | 2.93  | 0.16 | 2.78  | 2.73  | 2.59  | 3.07  | 2.89  | 2.93  | 2.84  | 2.94  | 2.85  | 0.15 | -3.00      | ns          |
| 8      | 11 | 5.26  | 5.15  | 4.87  | 4.95  | 5.17  | 4.91  | 4.99  | 5.04  | 0.15 | 3.68  | 4.12  | 4.16  | 3.87  | 3.52  | 3.82  | 3.91  | 3.88  | 3.87  | 0.21 | -23.26     | 0.0001      |
| 9      | 10 | 2.49  | 2.31  | 2.51  | 2.33  | 2.44  | 2.44  | 2.33  | 2.41  | 0.08 | 2.29  | 2.33  | 2.14  | 2.21  | 2.55  | 2.19  | 2.22  | 2.35  | 2.29  | 0.13 | -5.07      | 0.05        |
| 9      | 20 | 6.14  | 6.11  | 6.18  | 6.28  | 6.35  | 6.41  | 6.5   | 6.28  | 0.15 | 5.97  | 6.52  | 6.28  | 6.62  | 6.05  |       |       |       |       |      |            |             |
