# Supplementary material for: NFAT dysregulation by increased dosage of DSCR1 and DYRK1A on chromosome 21
Source: Springer Nature journal article supplement (doi:10.1038/nature04678), 2006-03-22
Supplement: 41586_2006_BFnature04678_MOESM4_ESM.pdf [file 41586_2006_BFnature04678_MOESM4_ESM.pdf]

## Lateral View of the Mandible

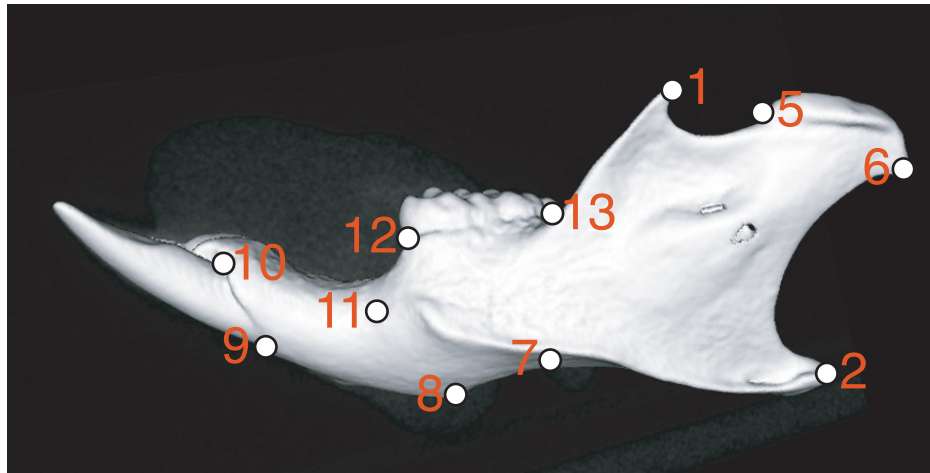

## Control Mice

## KO Mice

|        |    | #1    | #2    | #3    | #4    | #5    | #6    | #7    | Mean  | std  | #1    | #2    | #3    | #4    | #5    | #6    | #7    | #8    | Mean  | std  | change (%) | p-value (<) |
|--------|----|-------|-------|-------|-------|-------|-------|-------|-------|------|-------|-------|-------|-------|-------|-------|-------|-------|-------|------|------------|-------------|
| NFATc2 | wt | wt    | het   | het   | het   | het   | het   |       |       |      | ko    | ko    | ko    | ko    | ko    | ko    | ko    | ko    |       |      |            |             |
| NFATc3 | wt | wt    | wt    | wt    | wt    | wt    | wt    |       |       |      | het   | wt    | het   | wt    | wt    | het   | het   | wt    |       |      |            |             |
| NFATc4 | wt | wt    | het   | het   | het   | het   | het   |       |       |      | ko    | ko    | ko    | ko    | ko    | ko    | ko    | ko    |       |      |            |             |
| From   | To |       |       |       |       |       |       |       |       |      |       |       |       |       |       |       |       |       |       |      |            |             |
| 1      | 2  | 6.72  | 6.53  | 6.54  | 6.36  | 6.65  | 6.41  | 6.4   | 6.52  | 0.14 | 6.31  | 6.33  | 5.81  | 6.11  | 6.06  | 6.02  | 5.92  | 5.93  | 6.06  | 0.18 | -6.97      | 0.001       |
| 1      | 6  | 4.17  | 4.19  | 4.42  | 4.2   | 4.27  | 4.32  | 3.96  | 4.22  | 0.14 | 4.39  | 4.4   | 3.88  | 4.58  | 4.49  | 4.15  | 4.04  | 3.95  | 4.24  | 0.26 | 0.39       | ns          |
| 1      | 7  | 5.68  | 5.77  | 5.66  | 5.8   | 5.77  | 5.83  | 5.86  | 5.77  | 0.07 | 5.25  | 5.11  | 4.95  | 5.16  | 5.35  | 5.13  | 5.28  | 5.52  | 5.22  | 0.17 | -9.51      | 0.001       |
| 1      | 8  | 7.54  | 7.66  | 7.47  | 7.47  | 7.68  | 7.83  | 7.7   | 7.62  | 0.13 | 6.95  | 6.93  | 6.81  | 6.93  | 6.93  | 7.06  | 7.18  | 7.33  | 7.02  | 0.17 | -7.96      | 0.001       |
| 1      | 9  | 9.96  | 9.97  | 9.52  | 9.54  | 9.74  | 9.94  | 9.77  | 9.78  | 0.19 | 8.47  | 8.65  | 8.42  | 8.68  | 8.47  | 9.21  | 9.09  | 9.38  | 8.80  | 0.38 | -10.03     | 0.001       |
| 1      | 10 | 9.63  | 9.8   | 9.83  | 9.51  | 9.57  | 9.83  | 9.72  | 9.70  | 0.13 | 8.35  | 8.5   | 8.39  | 8.7   | 8.31  | 8.77  | 8.99  | 9.07  | 8.64  | 0.29 | -10.97     | 0.001       |
| 1      | 11 | 7.33  | 7.67  | 7.4   | 7.14  | 7.46  | 7.57  | 7.42  | 7.43  | 0.17 | 6.08  | 6.51  | 6.41  | 6.61  | 6.49  | 6.09  | 6.86  | 7.01  | 6.51  | 0.33 | -12.38     | 0.001       |
| 1      | 12 | 5.9   | 6     | 5.88  | 5.85  | 5.95  | 6.25  | 6.22  | 6.01  | 0.16 | 5.4   | 5.48  | 5.23  | 5.53  | 5.36  | 5.68  | 5.6   | 5.66  | 5.49  | 0.16 | -8.57      | 0.001       |
| 1      | 13 | 3.79  | 3.83  | 3.79  | 3.78  | 3.89  | 4.01  | 3.92  | 3.86  | 0.09 | 3.29  | 3.46  | 3.3   | 3.3   | 3.12  | 3.64  | 3.78  | 3.9   | 3.47  | 0.27 | -9.97      | 0.01        |
| 1R     | 1L | 9.66  | 9.54  | 9.69  | 9.72  | 9.66  | 9.88  | 9.86  | 9.72  | 0.12 | 9.32  | 9.44  | 9.27  | 9.11  | 8.89  | 9.58  | 9.29  | 10.17 | 9.38  | 0.38 | -3.41      | 0.05        |
| 2      | 6  | 3.92  | 3.89  | 3.98  | 4.06  | 4.04  | 4.18  | 3.98  | 4.01  | 0.10 | 4.03  | 3.99  | 3.41  | 3.89  | 3.8   | 3.77  | 4.17  | 3.97  | 3.88  | 0.23 | -3.20      | ns          |
| 2      | 7  | 3.96  | 3.95  | 3.78  | 3.57  | 4.27  | 3.73  | 3.5   | 3.82  | 0.26 | 4.12  | 4.1   | 3.7   | 4     | 3.5   | 3.93  | 3.88  | 3.99  | 3.90  | 0.21 | 2.08       | ns          |
| 2      | 8  | 7.28  | 7.29  | 7.45  | 7.19  | 7.43  | 7.31  | 7.33  | 7.33  | 0.09 | 6.8   | 6.95  | 6.81  | 7.01  | 6.78  | 6.89  | 6.74  | 6.69  | 6.83  | 0.11 | -6.72      | 0.001       |
| 2      | 9  | 11.52 | 11.35 | 11.29 | 11    | 11.36 | 11.11 | 11.1  | 11.25 | 0.18 | 10.63 | 10.31 | 10.07 | 10.39 | 10.15 | 10.69 | 10.39 | 10.25 | 10.36 | 0.22 | -7.89      | 0.001       |
| 2      | 10 | 12.29 | 12.46 | 12.18 | 12.1  | 12.57 | 12.27 | 12.39 | 12.32 | 0.16 | 11.18 | 11.26 | 11.13 | 11.42 | 11.02 | 10.05 | 11.25 | 11.12 | 11.05 | 0.42 | -10.30     | 0.001       |
| 2      | 11 | 9.15  | 9.31  | 9.33  | 8.96  | 9.46  | 8.97  | 9.16  | 9.19  | 0.19 | 8.24  | 8.65  | 8.28  | 8.59  | 8.37  | 7.74  | 8.3   | 8.27  | 8.31  | 0.28 | -9.64      | 0.001       |
| 2      | 12 | 8.94  | 8.88  | 8.91  | 8.69  | 8.97  | 8.69  | 8.79  | 8.84  | 0.12 | 8.11  | 8.25  | 7.82  | 8.33  | 8.17  | 7.96  | 7.8   | 7.72  | 8.02  | 0.23 | -9.26      | 0.001       |
| 2      | 13 | 6.69  | 6.59  | 6.67  | 6.37  | 6.81  | 6.48  | 6.53  | 6.59  | 0.15 | 6.18  | 6.13  | 5.64  | 5.98  | 5.58  | 5.33  | 5.08  | 5.26  | 5.65  | 0.41 | -14.32     | 0.001       |
| 2R     | 2L | 9.23  | 9.22  | 9.08  | 9.09  | 9.09  | 9.52  | 8.91  | 9.18  | 0.19 | 9.11  | 8.78  | 8.65  | 8.78  | 8.59  | 9.68  | 9.47  | 9.78  | 9.11  | 0.48 | -0.76      | ns          |
| 6      | 7  | 5.83  | 5.88  | 5.72  | 5.82  | 6.19  | 6.28  | 5.82  | 5.93  | 0.21 | 6.4   | 5.79  | 5.38  | 6.15  | 5.88  | 5.93  | 6.04  | 6.01  | 5.95  | 0.30 | 0.22       | ns          |
| 6      | 8  | 9     | 9.01  | 9.21  | 9     | 9.21  | 9.41  | 9.12  | 9.14  | 0.15 | 8.35  | 8.83  | 8.35  | 8.81  | 8.73  | 8.79  | 9.01  | 8.96  | 8.73  | 0.25 | -4.47      | 0.01        |
| 6      | 9  | 12.41 | 12.47 | 12.45 | 12.24 | 12.34 | 12.51 | 12.21 | 12.38 | 0.12 | 11.8  | 11.7  | 10.91 | 11.65 | 11.56 | 12.1  | 11.95 | 11.92 | 11.70 | 0.36 | -5.47      | 0.001       |
| 6      | 10 | 12.65 | 12.92 | 13.05 | 12.55 | 12.7  | 13.07 | 12.79 | 12.82 | 0.20 | 11.98 | 12    | 11.45 | 12.11 | 12.06 | 11.98 | 12.19 | 12.17 | 11.99 | 0.23 | -6.44      | 0.001       |
| 6      | 11 | 9.9   | 10.13 | 10.09 | 9.96  | 10.07 | 10.3  | 9.9   | 10.05 | 0.14 | 9.3   | 9.67  | 8.97  | 9.62  | 9.56  | 9.11  | 9.59  | 9.64  | 9.43  | 0.27 | -6.14      | 0.001       |
| 6      | 12 | 8.93  | 8.99  | 9.18  | 8.96  | 8.99  | 9.31  | 8.99  | 9.05  | 0.14 | 8.79  | 8.7   | 8.09  | 8.86  | 8.73  | 8.72  | 8.58  | 8.47  | 8.62  | 0.24 | -4.78      | 0.001       |
| 6      | 13 | 5.99  | 6.38  | 6.55  | 6.44  | 6.45  | 6.68  | 6.35  | 6.41  | 0.21 | 6.22  | 6.17  | 5.61  | 6.09  | 5.88  | 5.88  | 5.89  | 5.61  | 5.92  | 0.23 | -7.60      | 0.001       |
| 8      | 9  | 4.28  | 4.15  | 4.04  | 4.12  | 4.01  | 3.95  | 3.87  | 4.06  | 0.14 | 3.33  | 3.44  | 3.33  | 3.5   | 3.46  | 3.6   | 3.53  | 3.71  | 3.49  | 0.13 | -14.10     | 0.001       |
| 8      | 10 | 6     | 5.84  | 5.68  | 5.53  | 5.49  | 5.39  | 5.48  | 5.63  | 0.22 | 4.67  | 4.84  | 4.81  | 4.97  | 4.9   | 4.3   | 4.81  | 4.74  | 4.76  | 0.21 | -15.54     | 0.001       |
| 8      | 11 | 2.69  | 2.68  | 2.75  | 2.62  | 2.68  | 2.57  | 2.68  | 2.67  | 0.06 | 2.39  | 2.55  | 2.29  | 2.49  | 2.45  | 2.44  | 2.23  | 2.47  | 2.41  | 0.11 | -9.50      | 0.001       |
| 8      | 12 | 3.74  | 3.74  | 3.54  | 3.49  | 3.68  | 3.57  | 3.46  | 3.60  | 0.12 | 3.02  | 3.14  | 2.93  | 3.18  | 3.16  | 2.87  | 2.97  | 3.05  | 3.04  | 0.11 | -15.62     | 0.001       |
| 8      | 13 | 4.05  | 4.13  | 3.98  | 3.97  | 3.96  | 4.07  | 4.03  | 4.03  | 0.06 | 3.81  | 3.53  | 3.63  | 3.82  | 3.67  | 4.17  | 3.74  | 3.83  | 3.78  | 0.19 | -6.26      | 0.01        |
| 9      | 10 | 2.35  | 2.32  | 2.08  | 2.14  | 2.19  | 1.98  | 2.18  | 2.18  | 0.13 | 1.85  | 1.79  | 1.79  | 1.86  | 1.79  | 1.51  | 1.8   | 1.89  | 1.79  | 0.12 | -18.01     | 0.001       |
| 9      | 11 | 2.53  | 2.34  | 2.3   | 2.48  | 2.27  | 2.39  | 2.31  | 2.37  | 0.10 | 2.01  | 1.9   | 1.96  | 2.15  | 2.05  | 2.55  | 2.51  | 2.49  | 2.20  | 0.27 | -7.24      | ns          |
| 9      | 12 | 3.83  | 4.01  | 3.69  | 3.76  | 3.85  | 3.66  | 3.58  | 3.77  | 0.14 | 3.11  | 3.09  | 3.15  | 3.22  | 3.24  | 3.54  | 3.59  | 3.58  | 3.32  | 0.22 | -12.04     | 0.01        |
| 10     | 11 | 3.25  | 3.54  | 3.28  | 3.24  | 3.19  | 3.15  | 3.34  | 3.28  | 0.13 | 2.68  | 2.64  | 2.82  | 2.79  | 2.71  | 2.73  | 2.92  | 2.86  | 2.77  | 0.10 | -15.70     | 0.001       |
| 10     | 12 | 3.83  | 4.06  | 3.9   | 3.71  | 3.84  | 3.7   | 3.8   | 3.83  | 0.12 | 3.26  | 3.23  | 3.37  | 3.3   | 3.22  | 3.38  | 3.63  | 3.63  | 3.38  | 0.17 | -11.91     | 0.001       |
| 11     | 12 | 1.75  | 2.1   | 1.79  | 1.7   | 1.71  | 1.61  | 1.65  | 1.76  | 0.16 | 2.26  | 1.38  | 1.31  | 1.36  | 1.41  | 1.29  | 1.31  | 1.55  | 1.48  | 0.32 | -15.63     | ns          |
| 11     | 13 | 3.81  | 4.06  | 3.83  | 3.72  | 3.9   | 3.77  | 3.91  | 3.86  | 0.11 | 3.62  | 3.56  | 3.51  | 3.9   | 3.8   | 3.97  | 4.02  | 4.04  | 3.80  | 0.21 | -1.42      | ns          |
| 12     | 13 | 2.62  | 2.63  | 2.59  | 2.58  | 2.58  | 2.66  | 2.66  | 2.62  | 0.03 | 2.59  | 2.64  | 2.53  | 2.72  | 2.94  | 3.05  | 3.1   | 2.93  | 2.81  | 0.22 | 7.46       | 0.05        |

**Supplementary Figure 4** Measurement of mandible dimensions. **Top**, Landmarks used for mandible measurements based on those used in Richtsmeier *et al.* **Bottom**, Raw data for the seven control and eight NFATc2/c4 DKO mice measured in this study. Genotypes of the mice are shown at the top of the table. Change (%) and p-value are shown for each measurement and correspond to the colour coded lines in text Figure 1i. Measurement from the right landmark 1 (1R) to the left landmark 1 (1L) and from the right landmark 2 (2R) to the left landmark 2 (2L) indicate that the overall width of the jaw is not statistically different between control and NFATc2/c4 DKO mice.
