# Supplementary material for: NFAT dysregulation by increased dosage of DSCR1 and DYRK1A on chromosome 21
Source: Springer Nature journal article supplement (doi:10.1038/nature04678), 2006-03-22
Supplement: 41586_2006_BFnature04678_MOESM9_ESM.pdf [file 41586_2006_BFnature04678_MOESM9_ESM.pdf]

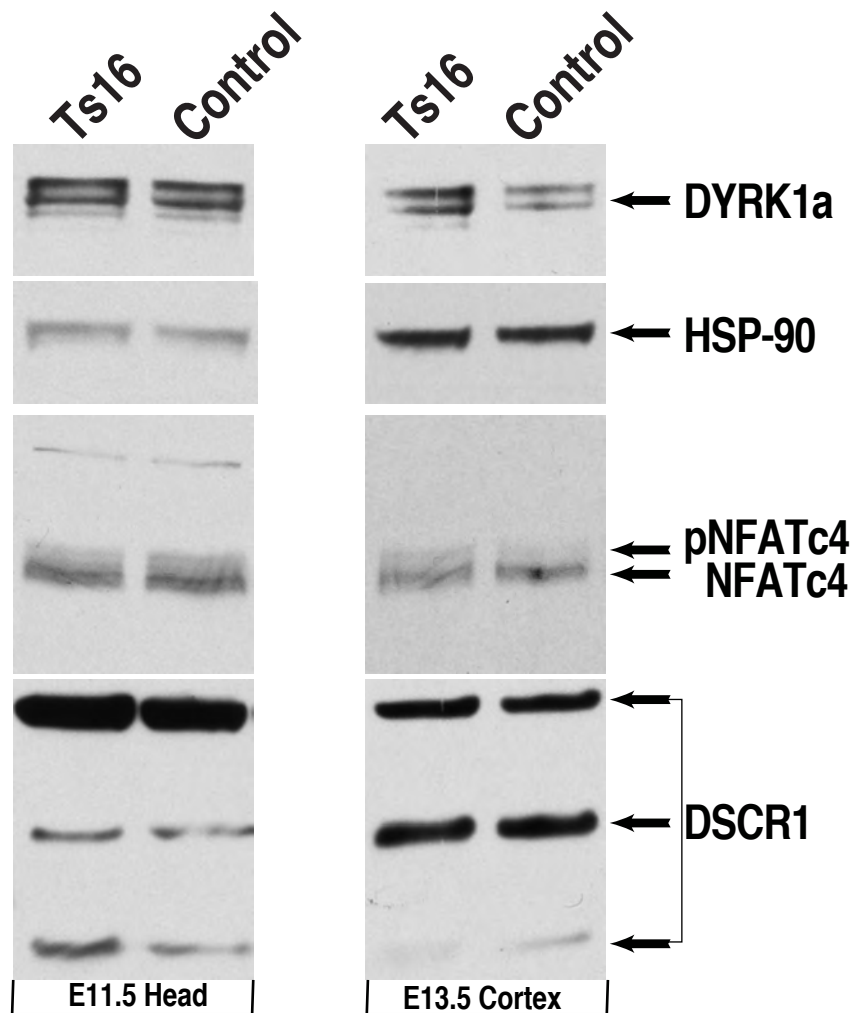

Immunoblot of DYRK1a, HSP-90, NFATc4 and DSCR1 in whole cell extracts from E11.5 heads and E13.5 cerebral cortex from trisomic and control Ts1Cje embryos. No overexpression of DYRK1a and DSCR1 protein can be observed at E11.5 and no change in NFATc4 phosphorylation can be seen at E11.5. In E13.5 cerebral cortex DYRK1a appears to be expressed at higher levels in the trisomic extract compared to the euploid control extract, while DSCR1 levels seem comparable. NFATc4 is modestly hyperphosphorylated in the E13.5 trisomic cortical sample.
